# Supplementary material
Source: publisher site journal article supplement (https://www.dovepress.com/article/supplementary_file/486730/486730-revised-supplementary-material.docx)
Supplement: Supplementary file 1 [file 486730-revised-supplementary-material.docx]

**Online Supplemental Materials for:**

**Nature and Outcomes of Longitudinal Authentic Leadership Profiles**

**Supplementary Material 1**

**Preliminary Measurement Models**

Due to the complexity of the longitudinal models underlying all constructs assessed in the present sample, preliminary analyses were conducted separately for the authentic leadership variables and the multi-item outcome (psychological need satisfaction). The measurement models were estimated using Mplus 8.71 using the maximum likelihood robust (MLR) estimator, which provides parameter estimates, standard errors, and goodness-of-fit that are robust to the non-normality of the response scales used in the present study. These models were estimated in conjunction with full information maximum likelihood (FIML)2 to handle missing data. Given the known oversensitivity of the chi-square test of exact fit (χ²) to sample size and minor model misspecifications (e.g., Marsh et al3), we relied on sample-size independent goodness-of-fit indices to describe the fit of the alternative models:4 The comparative fit index (CFI), the Tucker-Lewis index (TLI), as well as the root mean square error of approximation (RMSEA) and its 90% confidence interval. Values greater than .90 for the CFI and TLI indicate adequate model fit, although values greater than .95 are preferable. Values smaller than .08 or .06 for the RMSEA respectively support acceptable and excellent model fit.

The goodness-of-fit results from the preliminary measurement models used to investigate the optimal measurement structure for the authentic leadership questionnaire are reported in Table S2. Starting with an examination of the first-order confirmatory factor analyses (CFA) and exploratory structural equation modeling (ESEM) solutions, the CFA solution was not able to achieve an acceptable level of fit to the data, contrary to the ESEM solution, at both time points. Moreover, the factor correlations were substantially reduced in the ESEM relative to the CFA solutions, thus supporting the added-value of ESEM. Starting from this ESEM solution, the subsequent bifactor-ESEM solution was able to achieve a satisfactory level of fit to the data, and resulted in generally satisfactory parameter estimates. When interpreting bifactor-ESEM results, it is important to keep in mind that, because bifactor models rely on two factors to explain the covariance present at the item level for each specific item, factor loadings on global (G) and specific (S) factors are typically lower than their first-order counterparts (e.g., Morin et al5). As such, the critical question when interpreting a bifactor solution is whether the G-factor really taps into a meaningful amount of covariance shared among all items, and whether there remains sufficient specificity at the subscale level unexplained by the G-factor to result in the estimation of meaningful S-factors. Composite reliability coefficients associated with each of the a priori factors are calculated from the model standardized parameters using McDonald’s6 omega (ω) coefficient:

where are the standardized factor loadings associated with a factor in absolute values, and *δi*, the item uniquenesses.

The bifactor-ESEM solution revealed a well-defined G-factor (λ = .472 to .893, *Mλ* = .661 at T1; and λ = .530 to .814, *Mλ* = .705 at T2). Similarly, with the exception of a few items which mainly reflect the authentic leadership G-factor rather than their own a priori S-factors, the S-factors also retained a meaningful degree of specificity over and above employees’ G-levels of authentic leadership: |λ| = .121 to .497, *Mλ* = .322 for transparency S-factor at T1, and |λ| = .073 to .491, *Mλ* = .270 for transparency S-factor at T2; λ = .249 to .448, *Mλ* = .335 for moral perspective S-factor at T1, and λ = .189 to .623, *Mλ* = .320 for moral perspective S-factor at T2; |λ| = .133 to .476, *Mλ* = .296 for balanced processing S-factor at T1, and |λ| = .098 to .400, *Mλ* = .222 for balanced processing S-factor at T2; λ = .223 to .563, *Mλ* = .325 for self-awareness S-factor at T1, and λ = .155 to .487, *Mλ* = .343 for self-awareness S-factor at T2. Multiple cross-loadings were statistically significant, although they all remained reasonable in magnitude (|λ| = .004 to .346, *M*|*λ*| = .081 at T1; |λ| = .001 to .355, *M*|*λ*| = .079 at T2) and did not detract from a meaningful interpretation of the factors. Thus, these results support the superiority of the bifactor-ESEM solution.

This solution was thus retained for sequential tests of measurement invariance:7 (1) configural invariance; (2) weak invariance (loadings); (3) strong invariance (loadings and intercepts); (4) strict invariance (loadings, intercepts, and uniquenesses); (5) invariance of the latent variance-covariance matrix (loadings, intercepts, uniquenesses, correlated uniquenesses, and latent variances-covariances); and (6) latent means invariance (loadings, intercepts, uniquenesses, correlated uniquenesses, latent variances-covariances, and latent means). These tests were conducted for the total sample across measurement occasions (longitudinal invariance). Like the chi square, chi square difference tests are oversensitive to sample size and minor misspecifications. For this reason, invariance was assessed by considering changes in CFI and RMSEA.8,9 A ∆CFI/TLI of .010 or less and a ∆RMSEA of .015 or less between a more restricted model and the previous one support the invariance hypothesis.

The results from these tests, reported in Table S2, supported the configural, weak, strong, strict, latent variance-covariance, and latent means invariance of the model across time points. Factor scores used in the main analyses were extracted from the final longitudinal model of latent means invariance. Parameter estimates from this final longitudinal model of latent means invariance are reported in Table S3. The results from the bifactor-ESEM solution revealed a well-defined G-factor (λ = .513 to .808, *Mλ* = .678). Similarly, with the exception of a few items which mainly reflect the G-factor rather than their own a priori S-factors, the S-factors also retained a meaningful degree of specificity over and above employees’ G-levels of authentic leadership: λ = .155 to .511, *Mλ* = .346 for transparency S-factor; λ = .206 to .475, *Mλ* = .320 for moral perspective S-factor; |λ| = .236 to .370, *Mλ* = .294 for balanced processing S-factor; and |λ| = .022 to .580, *Mλ* = .279 for self-awareness S-factor.

As noted in the main manuscript, accumulating research evidence supports the idea that psychological need satisfaction ratings are best represented by a bifactor-ESEM operationalization10,11 making it possible to simultaneously assess respondents’ G-levels of need satisfaction together with non-redundant estimates of the specificity remaining at the levels of each need (S-factors) over and above these G-levels.5 The goodness-of-fit results from all need satisfaction models are reported in Table S4. These results clearly support the adequacy of the a priori bifactor-ESEM model underlying the need satisfaction measure (with all CFI and TLI ≥ .90, and all RMSEA ≤ .08) and its superiority relative to the other models. This solution was thus retained for sequential tests of measurement invariance.7 These tests were conducted for the total sample across measurement occasions (longitudinal invariance). The results from these tests, reported in Table S4, supported the configural, weak, strong, and strict invariance of the model across time points. Factor scores used in the main analyses were extracted from the final longitudinal model of strict invariance. Parameter estimates from this final longitudinal model of strict invariance are reported in Table S5.

The results from the bifactor-ESEM solution revealed a well-defined G-factor (λ = .282 to .914, *Mλ* = .530 at T1; and λ = .282 to .978, *Mλ* = .528 at T2). Similarly, with the exception of a few items which mainly reflect the need satisfaction G-factor rather than their own a priori S-factors, the S- factors also retained a meaningful degree of specificity over and above employees’ G-levels of need satisfaction: λ = .412 to .833, *Mλ* = .622 for relatedness need satisfaction S-factor at T1, and λ = .355 to .752, *Mλ* = .552 for relatedness need satisfaction S-factor at T2; |λ| = .015 to .703, *Mλ* = .314 for competence need satisfaction S-factor at T1, and |λ| = .012 to .599, *Mλ* = .269 for competence need satisfaction S-factor at T2; λ = .244 to .405, *Mλ* = .343 for autonomy need satisfaction S-factor at T1, and λ = .334 to .533, *Mλ* = .456 for autonomy need satisfaction S-factor at T2. Factor scores were saved from this most invariant measurement model and used as outcome indicators in the main research. The correlations between all variables are reported in Table S6.

**References**

1. Muthén LK, Muthén B. Mplus user’s guide. Published online 2021.

2. Enders CK. *Applied Missing Data Analysis, 2nd Ed*. The Guilford Press; 2022:ix, 546.

3. Marsh HW, Hau KT, Grayson D. Goodness of Fit in Structural Equation Models. In: *Contemporary Psychometrics: A Festschrift for Roderick P. McDonald*. Multivariate applications book series. Lawrence Erlbaum Associates Publishers; 2005:275-340.

4. Hu L tze, Bentler PM. Cutoff criteria for fit indexes in covariance structure analysis: Conventional criteria versus new alternatives. *Struct Equ Model*. 1999;6(1):1-55. doi:10.1080/10705519909540118

5. Morin A, Arens AK, Marsh HW. A bifactor exploratory structural equation modeling framework for the identification of distinct sources of construct-relevant psychometric multidimensionality. *Struct Equ Model Multidiscip J*. 2016;23(1):116-139. doi:10.1080/10705511.2014.961800

6. McDonald RP. The theoretical foundations of principal factor analysis, canonical factor analysis, and alpha factor analysis. *Br J Math Stat Psychol*. 1970;23(1):1-21. doi:10.1111/j.2044-8317.1970.tb00432.x

7. Millsap RE. *Statistical Approaches to Measurement Invariance*. Routledge; 2012. doi:10.4324/9780203821961

8. Chen FF. Sensitivity of goodness of fit indexes to lack of measurement invariance. *Struct Equ Model Multidiscip J*. 2007;14(3):464-504. doi:10.1080/10705510701301834

9. Cheung GW, Rensvold RB. Evaluating goodness-of-fit indexes for testing measurement invariance. *Struct Equ Model Multidiscip J*. 2002;9(2):233-255. doi:10.1207/S15328007SEM0902_5

10. Huyghebaert-Zouaghi T, Ntoumanis N, Berjot S, Gillet N. Advancing the conceptualization and measurement of psychological need states: A 3 × 3 model based on self-determination theory. *J Career Assess*. 2021;29(3):396-421. doi:10.1177/1069072720978792

11. Gillet N, Morin AJS, Huart I, Colombat P, Fouquereau E. The forest and the trees: Investigating the globality and specificity of Work-related Basic Need Satisfaction at work. *J Pers Assess*. 2020;102(5):702-713. doi:10.1080/00223891.2019.1591426

**Table S1**

*Baseline Sample Characteristics (n = 750)*

| Variable | | Description |
| --- | --- | --- |
| Gender | |  |
|  | Male (n (%)) | 96 (12.78) |
|  | Female (n (%)) | 654 (87.22) |
| Age (mean ± SD) | | 40.40 ± 9.71 |
| Organizational tenure (mean ± SD) | | 14.13 ± 9.19 |
| Tenure in the current position (mean ± SD) | | 6.34 ± 6.27 |
| Occupation | |  |
|  | Nurses (n (%)) | 304 (40.53) |
|  | Nursing assistants (n (%)) | 208 (27.73 |
|  | Physicians (n (%)) | 103 (13.73) |
|  | Secretaries (n (%)) | 71 (9.47) |
|  | Hospital service workers (n (%)) | 25 (3.33) |
|  | Others (n (%)) | 39 (5.20) |
| Contract | |  |
|  | Probationary period (n (%)) | 34 (4.53) |
|  | Civil servant (n (%)) | 652 (86.93) |
|  | Fixed-term (n (%)) | 61 (8.13) |
|  | Permanent (n (%)) | 3 (0.40) |
| Working time | |  |
|  | Full-time (n (%)) | 500 (66.67) |
|  | Part-time (n (%)) | 250 (33.33) |
| Work shift | |  |
|  | Night work (n (%)) | 103 (13.73) |
|  | Day work (n (%)) | 578 (77.07) |
|  | Day/night alternation (n (%)) | 69 (9.20) |
|  | | |

**Table S2**

*Goodness-of-Fit Statistics for the Estimated Models (Authentic Leadership)*

| Description | *χ*² (*df*) | CFI | TLI | RMSEA | 90% CI | CM | *∆χ²* (*df*) | ∆CFI | ∆TLI | ∆RMSEA |
| --- | --- | --- | --- | --- | --- | --- | --- | --- | --- | --- |
| *Authentic Leadership* |  |  |  |  |  |  |  |  |  |  |
| Time 1 CFA | 569.330 (98)* | .907 | .886 | .080 | [.074; .087] | - | - | - | - | - |
| Time 1 ESEM | 208.241 (62)* | .971 | .944 | .056 | [.048; .065] | - | - | - | - | - |
| Time 1 Bifactor-CFA | 420.583 (88)* | .935 | .911 | .071 | [.064; .078] | - | - | - | - | - |
| Time 1 Bifactor-ESEM | 131.804 (50)* | .984 | .961 | .047 | [.037; .057] | - | - | - | - | - |
| Time 2 CFA | 482.436 (98)* | .910 | .890 | .085 | [.078; .093] | - | - | - | - | - |
| Time 2 ESEM | 176.582 (62)* | .973 | .948 | .059 | [.048; .069] | - | - | - | - | - |
| Time 2 Bifactor-CFA | 311.253 (88)* | .948 | .929 | .069 | [.060; .077] | - | - | - | - | - |
| Time 2 Bifactor-ESEM | 115.167 (50)* | .985 | .963 | .049 | [.037; .061] | - | - | - | - | - |
| *Authentic Leadership: Longitudinal Invariance* | | |  |  |  |  |  |  |  |  |
| M1. Configural invariance | 524.022 (315)* | .980 | .969 | .030 | [.025; .034] | - | - | - | - | - |
| M2. Weak invariance | 587.108 (378)* | .979 | .973 | .028 | [.024; .032] | M1 | 67.543 (63) | -.001 | +.004 | -.002 |
| M3. Strong invariance | 617.983 (381)* | .978 | .971 | .029 | [.025; .033] | M2 | 32.460 (3)* | -.001 | -.002 | +.001 |
| M4. Strict invariance | 679.292 (397)* | .973 | .967 | .031 | [.027; .035] | M3 | 58.883 (16)* | -.005 | -.004 | +.002 |
| M5. Variance-covariance invariance | 703.341 (412)* | .972 | .967 | .031 | [.027; .035] | M4 | 24.243 (15) | -.001 | .000 | .000 |
| M6. Latent means invariance | 733.537 (417)* | .970 | .964 | .032 | [.028; .036] | M5 | 29.221 (5)* | -.002 | -.003 | +.001 |

*Note.* * *p*< .05; CFA: Confirmatory factor analyses; ESEM: Exploratory Structural Equation Modeling; *χ*²: Scaled chi-square test of exact fit; *df*: Degrees of freedom; CFI: Comparative fit index; TLI: Tucker-Lewis index; RMSEA: Root mean square error of approximation; 90% CI: 90% confidence interval; CM: Comparison model; and Δ: Change in fit relative to the CM.

**Table S3**

*Standardized Factor Loadings (λ) and Uniquenesses (δ) for the M6 Solution (Longitudinal Latent Means Invariance Authentic Leadership)*

| Items | G-factor λ | S-Transparency λ | S-Moral perspective λ | S-Balanced processing λ | S-Self-awareness λ | δ |
| --- | --- | --- | --- | --- | --- | --- |
| Transparency |  |  |  |  |  |  |
| Item 1 | **.591** | **.511** | .120 | *.047* | *-.032* | .371 |
| Item 2 | **.722** | **.155** | *.046* | .200 | .091 | .404 |
| Item 3 | **.743** | **.216** | *-.011* | .132 | *-.033* | .382 |
| Item 4 | **.650** | **.471** | *-.012* | *-.050* | *.025* | .351 |
| Item 5 | **.513** | **.375** | *.046* | -.219 | *.003* | .546 |
| Moral perspective |  |  |  |  |  |  |
| Item 1 | **.699** | .162 | **.344** | .163 | *.011* | .340 |
| Item 2 | **.655** | .067 | **.475** | *-.031* | *-.013* | .339 |
| Item 3 | **.667** | *-.031* | **.206** | -.131 | *-.020* | .494 |
| Item 4 | **.640** | *.033* | **.253** | -.098 | *.029* | .515 |
| Balanced processing |  |  |  |  |  |  |
| Item 1 | **.559** | *-.023* | *-.039* | **-.277** | .113 | .596 |
| Item 2 | **.767** | *-.012* | .092 | **.236** | *-.021* | .347 |
| Item 3 | **.808** | -.098 | -.119 | **.370** | -.102 | .175 |
| Self-awareness |  |  |  |  |  |  |
| Item 1 | **.787** | *-.053* | -.085 | .090 | ***-.022*** | .362 |
| Item 2 | **.550** | *.002* | -.092 | -.349 | **.308** | .472 |
| Item 3 | **.722** | *.013* | .039 | .071 | **.580** | *.136* |
| Item 4 | **.779** | *.010* | *.038* | *.037* | **.204** | .349 |
| ω | .950 | .592 | .492 | .411 | .485 |  |

*Note*. λ: Factor loading; δ: Item uniqueness; ω: Omega coefficient of composite reliability; target factor loadings are indicated in bold; the non-significant parameters (*p* > .05) are marked in italics.

**Table S4**

*Goodness-of-Fit Statistics for the Estimated Models (Need Satisfaction)*

| Description | *χ*² (*df*) | CFI | TLI | RMSEA | 90% CI | CM | *∆χ²* (*df*) | ∆CFI | ∆TLI | ∆RMSEA |
| --- | --- | --- | --- | --- | --- | --- | --- | --- | --- | --- |
| *Need Satisfaction* |  |  |  |  |  |  |  |  |  |  |
| Time 1 CFA | 130.910 (24)* | .908 | .862 | .077 | [.064; .090] | - | - | - | - | - |
| Time 1 ESEM | 56.103 (12)* | .962 | .886 | .070 | [.052; .089] | - | - | - | - | - |
| Time 1 Bifactor-CFA | 92.725 (18)* | .936 | .871 | .074 | [.060; .090] | - | - | - | - | - |
| Time 1 Bifactor-ESEM | 7.358 (6) | .999 | .993 | .017 | [.000; .053] | - | - | - | - | - |
| Time 2 CFA | 94.954 (24)* | .930 | .895 | .074 | [.059; .090] | - | - | - | - | - |
| Time 2 ESEM | 88.221 (12)* | .924 | .773 | .109 | [.088; .130] | - | - | - | - | - |
| Time 2 Bifactor-CFA | 74.898 (18)* | .944 | .887 | .077 | [.059; .095] | - | - | - | - | - |
| Time 2 Bifactor-ESEM | 6.716 (6) | .999 | .996 | .015 | [.000; .059] | - | - | - | - | - |
| *Need Satisfaction: Longitudinal Invariance* | |  |  |  |  |  |  |  |  |  |
| M1. Configural invariance | 99.528 (68)* | .989 | .976 | .025 | [.013; .035] | - | - | - | - | - |
| M2. Weak invariance | 99.842 (88)* | .996 | .993 | .013 | [.000; .025] | M1 | 13.027 (20) | +.007 | +.017 | -.012 |
| M3. Strong invariance | 108.350 (93)* | .995 | .992 | .015 | [.000; .026] | M2 | 13.049 (5)* | -.001 | -.001 | +.002 |
| M4. Strict invariance | 127.976 (102)* | .991 | .987 | .018 | [.004; .028] | M3 | 14.523 (9) | -.004 | -.005 | +.003 |
| M5. Variance-covariance invariance | 184.112 (112)* | .976 | .967 | .029 | [.021; .037] | M4 | 61.307 (10)* | -.015 | -.020 | +.011 |

*Note.* * *p*< .01; CFA: Confirmatory factor analysis; ESEM: Exploratory Structural Equation Modeling*; χ*²: Scaled chi-square test of exact fit; *df*: Degrees of freedom; CFI: Comparative fit index; TLI: Tucker-Lewis index; RMSEA: Root mean square error of approximation; 90% CI: 90% confidence interval; CM: Comparison model; and Δ: Change in fit relative to the CM.

**Table S5**

*Standardized Factor Loadings (λ) and Uniquenesses (δ) for the M4 Solution (Longitudinal Latent Strict Invariance Need Satisfaction)*

| Items | G-factor λ | S-Relatedness λ | S-Competence λ | S-Autonomy λ | δ |
| --- | --- | --- | --- | --- | --- |
| Relatedness |  |  |  |  |  |
| Item 1 | **.282** | **.621 / .550** | .071 / .058 | .079 / .113 | .523 / .516 |
| Item 2 | **.335 / .342** | **.833 / .752** | -.108 / -.090 | .089 / .131 | .174 / .178 |
| Item 3 | **.437 / .425** | **.412 / .355** | .098 / .077 | .080 / .112 | .624 / .584 |
| Competence |  |  |  |  |  |
| Item 1 | **.702 / .736** | -.052 / -.048 | **.703 / .599** | -.042 / -.063 | .008 |
| Item 2 | **.914 / .978** | -.133 / -.126 | **-.224 / -.195** | -.105 / -.161 | .086 / .097 |
| Item 3 | **.614 / .617** | -.098 / -.088 | **-.015 / -.012** | .123 / .177 | .598 / .596 |
| Autonomy |  |  |  |  |  |
| Item 1 | **.449 / .427** | .309 / .260 | .011 / .009 | **.244 / .334** | .643 / .574 |
| Item 2 | **.593 / .546** | .001 | -.054 / -.040 | **.379 / .501** | .502 / .420 |
| Item 3 | **.440 / .402** | .016 / .013 | .010 / .008 | **.405 / .533** | .642 / .529 |
| ω | .857 / .866 | .725 / .682 | .562 / .481 | .372 / .551 |  |

*Note*. λ: Factor loading; δ: Item uniqueness; ω: Omega coefficient of composite reliability; target factor loadings are indicated in bold.

**Table S6**

*Correlations Between Variables*

|  | 1 | 2 | 3 | 4 | 5 | 6 | 7 | 8 | 9 | 10 | 11 | 12 | 13 | 14 | 15 | 16 | 17 | 18 |
| --- | --- | --- | --- | --- | --- | --- | --- | --- | --- | --- | --- | --- | --- | --- | --- | --- | --- | --- |
| 1. Sex | - |  |  |  |  |  |  |  |  |  |  |  |  |  |  |  |  |  |
| 2. Age | -.063 | - |  |  |  |  |  |  |  |  |  |  |  |  |  |  |  |  |
| 3. Status | .152** | .057 | - |  |  |  |  |  |  |  |  |  |  |  |  |  |  |  |
| 4. Position | .106** | .380** | .201** | - |  |  |  |  |  |  |  |  |  |  |  |  |  |  |
| 5. G-Authentic (T1)† | -.091* | -.107** | .025 | -.070 | - |  |  |  |  |  |  |  |  |  |  |  |  |  |
| 6. S-Transparency (T1)† | .066 | -.025 | -.020 | .035 | .025 | - |  |  |  |  |  |  |  |  |  |  |  |  |
| 7. S-Moral perspective (T1)† | -.100** | .071 | -.027 | -.024 | .037 | .080* | - |  |  |  |  |  |  |  |  |  |  |  |
| 8. S-Balanced processing (T1)† | .092* | .101** | .003 | .010 | .089* | -.103** | -.073* | - |  |  |  |  |  |  |  |  |  |  |
| 9. S-Self-awareness (T1)† | -.025 | -.007 | -.066 | -.051 | .050 | -.033 | -.022 | -.028 | - |  |  |  |  |  |  |  |  |  |
| 10. G-Need satisfaction (T1)† | -.094* | .099** | -.041 | .080* | .138** | .052 | .060 | -.066 | .022 | - |  |  |  |  |  |  |  |  |
| 11. S-Relatedness (T1)† | -.050 | -.083* | .030 | -.049 | .120** | .025 | .034 | .007 | -.004 | -.005 | - |  |  |  |  |  |  |  |
| 12. S-Competence (T1)† | -.032 | .100** | -.012 | .085* | -.010 | -.028 | -.011 | .006 | .023 | .013 | .011 | - |  |  |  |  |  |  |
| 13. S-Autonomy (T1)† | -.022 | .011 | -.030 | .045 | .205** | -.025 | .046 | .082* | -.033 | -.075* | .136** | .061 | - |  |  |  |  |  |
| 14. Anhedonia (T1) | .014 | .002 | -.006 | -.006 | -.065 | .049 | -.013 | -.030 | .013 | -.182** | -.079* | .085* | -.023 | - |  |  |  |  |
| 15. Safety (T1) | -.196** | .017 | -.036 | .002 | .202** | .015 | .157** | -.032 | -.050 | .210** | -.027 | -.056 | .082* | -.130** | - |  |  |  |
| 16. G-Authentic (T2)† | -.093* | -.073* | .026 | -.034 | .642** | -.097** | .113** | -.014 | .048 | .123** | .087* | -.011 | .136** | -.062 | .207** | - |  |  |
| 17. S-Transparency (T2)† | -.012 | -.019 | -.009 | .038 | .153** | .536** | -.165** | -.101** | -.052 | .016 | .022 | .017 | .010 | .044 | .042 | .106** | - |  |
| 18. S-Moral perspective (T2)† | -.068 | .073* | -.028 | .003 | .076* | .290** | .586** | .085* | .197** | .071 | -.005 | -.011 | -.003 | .019 | .114** | .071 | .085* | - |
| 19. S-Balanced processing (T2)† | .104** | .091* | .040 | .020 | -.132** | -.042 | -.003 | .677** | -.045 | -.086* | .019 | -.026 | .023 | -.063 | -.032 | .041 | -.124** | -.029 |
| 20. S-Self-awareness (T2)† | .000 | .013 | -.075* | -.039 | -.058 | .036 | .017 | .134** | .730** | .018 | .008 | .033 | -.046 | .052 | -.032 | .058 | -.060 | .063 |
| 21. G-Need satisfaction (T2)† | -.066 | .049 | -.057 | .075* | .156** | .045 | .037 | -.070 | .027 | .788** | .019 | .109** | -.167** | -.155** | .150** | .230** | .025 | .062 |
| 22. S-Relatedness (T2)† | -.037 | -.095** | -.017 | -.043 | .166** | .044 | -.004 | -.027 | .018 | .023 | .661** | .093* | .070 | -.091* | .007 | .215** | .038 | .005 |
| 23. S-Competence (T2)† | -.033 | .091* | -.024 | .084* | .007 | -.023 | .011 | .013 | .013 | .098** | .101** | .956** | .163** | .067 | -.038 | -.012 | .008 | .009 |
| 24. S-Autonomy (T2)† | -.002 | -.051 | -.030 | .017 | .236** | .015 | .047 | .035 | -.019 | -.013 | .039 | -.142** | .769** | -.033 | .073* | .240** | .013 | .016 |
| 25. Anhedonia (T2) | .024 | .064 | .004 | .016 | -.041 | -.055 | -.050 | .034 | .016 | -.107* | -.076 | .078 | .004 | .283** | .024 | -.042 | .083 | -.002 |
| 26. Safety (T2) | -.094* | .095* | .033 | .069 | .150** | .011 | .176** | .015 | .005 | .200** | -.013 | -.052 | .031 | -.095* | .498** | .248** | .064 | .176** |

*Note*. * *p* < .05; ** *p* < .01; † variables estimated from factor scores with a mean of 0 and a standard deviation of 1; sex was coded 0 for men and 1 for women; status was coded 0 for employed full-time and 1 for employed part-time; and position was coded 0 for temporary workers and 1 for permanent workers.

**Table S6 (Continued)**

*Correlations Between Variables*

|  | 19 | 20 | 21 | 22 | 23 | 24 | 25 | 26 |
| --- | --- | --- | --- | --- | --- | --- | --- | --- |
| 19. S-Balanced processing (T2)† | - |  |  |  |  |  |  |  |
| 20. S-Self-awareness (T2)† | -.075* | - |  |  |  |  |  |  |
| 21. G-Need satisfaction (T2)† | -.077* | .036 | - |  |  |  |  |  |
| 22. S-Relatedness (T2)† | -.009 | .016 | .258** | - |  |  |  |  |
| 23. S-Competence (T2)† | -.031 | .028 | .153** | .113** | - |  |  |  |
| 24. S-Autonomy (T2)† | .023 | -.035 | .013 | .047 | -.115** | - |  |  |
| 25. Anhedonia (T2) | -.016 | .023 | -.147** | -.106* | .047 | -.019 | - |  |
| 26. Safety (T2) | .004 | .033 | .209** | .070 | -.056 | .077 | -.008 | - |

*Note*. * *p* < .05; ** *p* < .01; † variables estimated from factor scores with a mean of 0 and a standard deviation of 1; sex was coded 0 for men and 1 for women; status was coded 0 for employed full-time and 1 for employed part-time; and position was coded 0 for temporary workers and 1 for permanent workers.

**Table S7**

*Results from the Latent Profile Analysis Models at Times 1 and 2*

| Model | LL | #fp | Scaling | AIC | CAIC | BIC | ABIC | Entropy | aLMR | BLRT |
| --- | --- | --- | --- | --- | --- | --- | --- | --- | --- | --- |
| *Time 1* | |  |  |  |  |  |  |  |  |  |
| 1 Profile | -4618.529 | 10 | 1.114 | 9257.058 | 9313.259 | 9303.259 | 9271.505 | Na | Na | Na |
| 2 Profiles | -4588.517 | 16 | 1.079 | 9209.033 | 9298.954 | 9282.954 | 9232.148 | .912 | .003 | <.001 |
| 3 Profiles | -4561.659 | 22 | 1.258 | 9167.317 | 9290.959 | 9268.959 | 9199.100 | .803 | .199 | <.001 |
| 4 Profiles | -4536.240 | 28 | 1.131 | 9128.481 | 9285.843 | 9257.843 | 9168.932 | .801 | .003 | <.001 |
| 5 Profiles | -4520.664 | 34 | 1.123 | 9109.327 | 9300.410 | 9266.410 | 9158.446 | .749 | .047 | <.001 |
| 6 Profiles | -4500.126 | 40 | 1.175 | 9080.252 | 9305.055 | 9265.055 | 9138.040 | .741 | .085 | <.001 |
| 7 Profiles | -4486.632 | 46 | 1.137 | 9065.265 | 9323.788 | 9277.788 | 9131.720 | .758 | .098 | <.001 |
| 8 Profiles | -4474.310 | 52 | 1.207 | 9052.619 | 9344.863 | 9292.863 | 9127.743 | .764 | .565 | <.001 |
| *Time 2* |  |  |  |  |  |  |  |  |  |  |
| 1 Profile | -4143.322 | 10 | 1.279 | 8306.644 | 8362.844 | 8352.844 | 8321.090 | Na | Na | Na |
| 2 Profiles | -4104.775 | 16 | 1.228 | 8241.550 | 8331.471 | 8315.471 | 8264.665 | .914 | .001 | <.001 |
| 3 Profiles | -4066.706 | 22 | 1.226 | 8177.413 | 8301.054 | 8279.054 | 8209.196 | .900 | .001 | <.001 |
| 4 Profiles | -4029.433 | 28 | 1.307 | 8114.866 | 8272.228 | 8244.228 | 8155.317 | .830 | .027 | <.001 |
| 5 Profiles | -4003.904 | 34 | 1.257 | 8075.807 | 8266.890 | 8232.890 | 8124.926 | .854 | .007 | <.001 |
| 6 Profiles | -3976.723 | 40 | 1.272 | 8033.445 | 8258.248 | 8218.248 | 8091.233 | .866 | .057 | <.001 |
| 7 Profiles | -3960.914 | 46 | 1.254 | 8013.828 | 8272.351 | 8226.351 | 8080.283 | .847 | .050 | <.001 |
| 8 Profiles | -3947.920 | 52 | 1.412 | 7999.841 | 8292.084 | 8240.084 | 8074.964 | .858 | .744 | <.001 |

*Note*. LL: Model loglikelihood; #fp: Number of free parameters; scaling: Scaling correction factor associated with robust maximum likelihood estimates; AIC: Akaïke information criteria; CAIC: Constant AIC; BIC: Bayesian information criteria; ABIC: Sample size adjusted BIC; aLMR: Adjusted Lo-Mendel-Rubin likelihood ratio test; and BLRT: Bootstrap likelihood ratio test.

**Figure S1**

Elbow Plot of the Value of the Information Criteria for Solutions Including Different Numbers of Latent Profiles at Time 1

**Figure S2**

Elbow Plot of the Value of the Information Criteria for Solutions Including Different Numbers of Latent Profiles at Time 2

**Table S8**

*Detailed Parameter Estimates from the Final LPA Solution (Distributional Similarity)*

|  | Profile 1 | Profile 2 | Profile 3 | Profile 4 |
| --- | --- | --- | --- | --- |
|  | Mean [CI] | Mean [CI] | Mean [CI] | Mean [CI] |
| G-Authentic | -1.468 [-1.641; -1.295] | .242 [.161; .324] | -.064 [-.216; .087] | -.063 [-.317; .190] |
| S-Transparency | -.109 [-.389; .171] | .031 [-.028; .090] | -.042 [-.282; .198] | -.357 [-.718; .003] |
| S-Moral perspective | -.206 [-.554; .141] | .057 [-.001; .115] | -.095 [-.353; .163] | .005 [-.349; .358] |
| S-Balanced processing | -.387 [-.584; -.189] | -.082 [-.138; -.025] | .421 [.220; .622] | 1.485 [1.186; 1.785] |
| S-Self-awareness | .046 [-.091; .183] | .120 [.043; .196] | -1.480 [-1.764; -1.196] | .919 [.649; 1.190] |
|  | Profile 1 | Profile 2 | Profile 3 | Profile 4 |
|  | Variance [CI] | Variance [CI] | Variance [CI] | Variance [CI] |
| G-Authentic | .610 [.517; .703] | .610 [.517; .703] | .610 [.517; .703] | .610 [.517; .703] |
| S-Transparency | .653 [.577; .730] | .653 [.577; .730] | .653 [.577; .730] | .653 [.577; .730] |
| S-Moral perspective | .546 [.476; .615] | .546 [.476; .615] | .546 [.476; .615] | .546 [.476; .615] |
| S-Balanced processing | .489 [.417; .561] | .489 [.417; .561] | .489 [.417; .561] | .489 [.417; .561] |
| S-Self-awareness | .496 [.401; .592] | .496 [.401; .592] | .496 [.401; .592] | .496 [.401; .592] |

*Note*. CI = 95% confidence interval; the profile indicators are estimated from factor scores with a mean of 0 and a standard deviation of 1; Profile 1: *Low Global Authentic*; Profile 2: *Normative*; Profile 3: *Low Specific Self-Awareness*; and Profile 4: *High Specific Balanced Processing*.

**Table S9**

*Classification Accuracy: Average Probability of Membership into Each Latent Profile (Column) as a Function of the Most Likely Profile Membership (Row)*

|  | Profile 1 | Profile 2 | Profile 3 | Profile 4 |
| --- | --- | --- | --- | --- |
| *Time 1* |  |  |  |  |
| Profile 1 | .781 | .197 | .021 | .001 |
| Profile 2 | .051 | .922 | .019 | .008 |
| Profile 3 | .038 | .207 | .749 | .006 |
| Profile 4 | .001 | .102 | .009 | .888 |
| *Time 2* |  |  |  |  |
| Profile 1 | .839 | .150 | .009 | .002 |
| Profile 2 | .043 | .916 | .033 | .008 |
| Profile 3 | .021 | .104 | .871 | .003 |
| Profile 4 | .001 | .104 | .001 | .894 |

*Note*. Profile 1: *Low Global Authentic*; Profile 2: *Normative*; Profile 3: *Low Specific Self-Awareness*; and Profile 4: *High Specific Balanced Processing*.
